# Supplementary material for: A Technical Study of Chinese Buddhist Sculptures: First Insights into a Complex History of Transformation through Analysis of the Polychrome Decoration
Source: MDPI journal article supplement (doi:10.3390/coatings14030344), 2024-03-13
Supplement: s1 [file s1]

## Supplementary Materials

(a) Inv. 450, sample 6

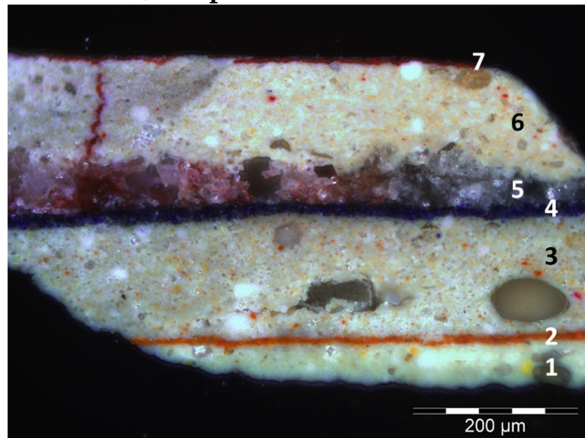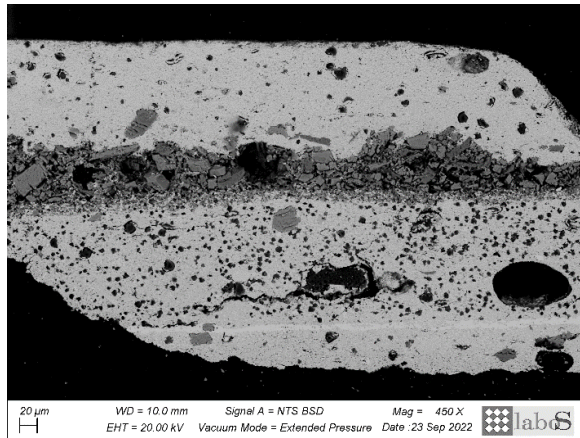

Layer 2: minium

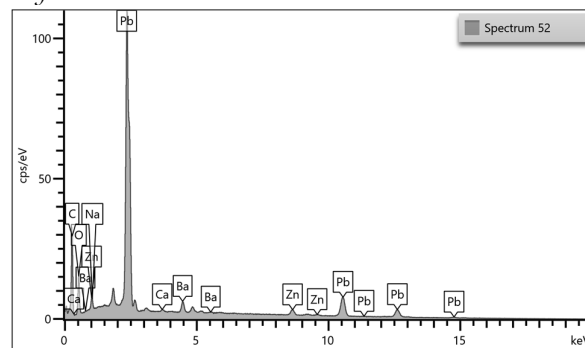

Layer 4: ultramarine blue

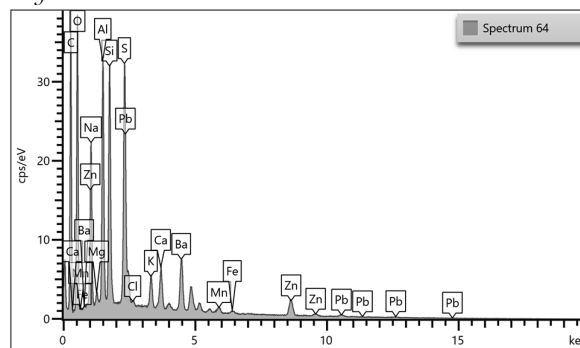

(b) Inv. 449, sample 11

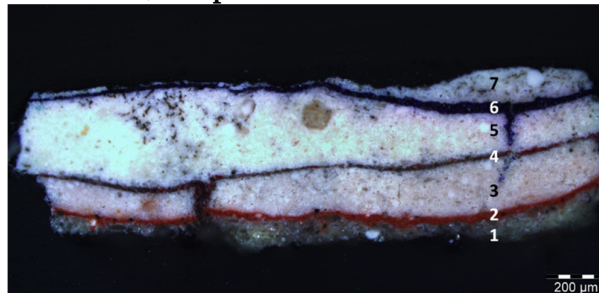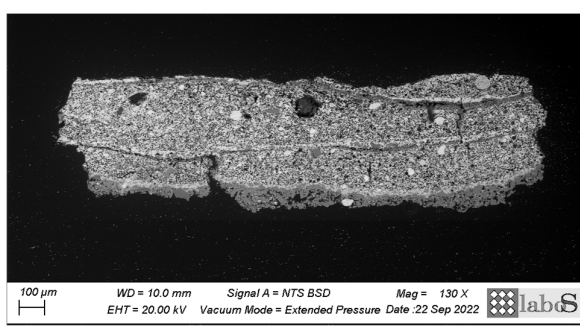

Layer 5: lithopone

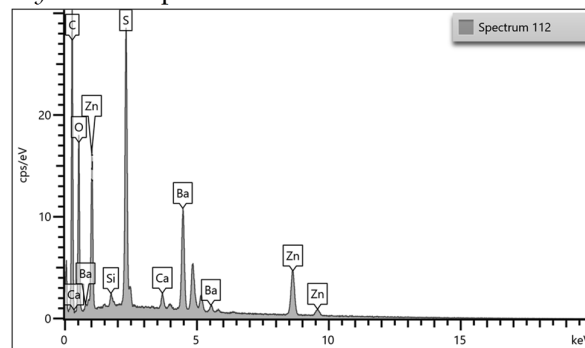

Layer 2: iron-containing red

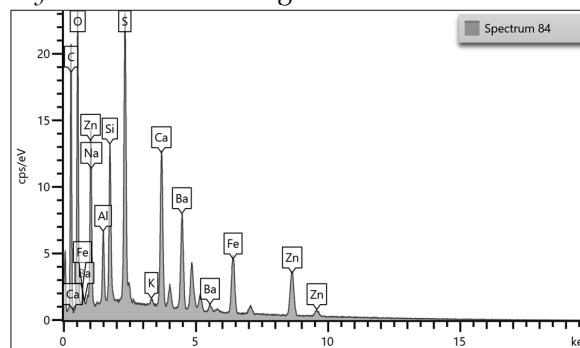

**Figure S1 – Representative EDS spectra.** (a) EDS spectra acquired on a cross section from Inv. 450, showing the presence of minium and ultramarine blue among other materials.(b) EDS spectra acquired on a cross section from Inv. 449, showing the presence of lithopone and an iron-containing red among other materials. The polarized light and BSE images obtained from the samples are also displayed above the corresponding EDS spectra.

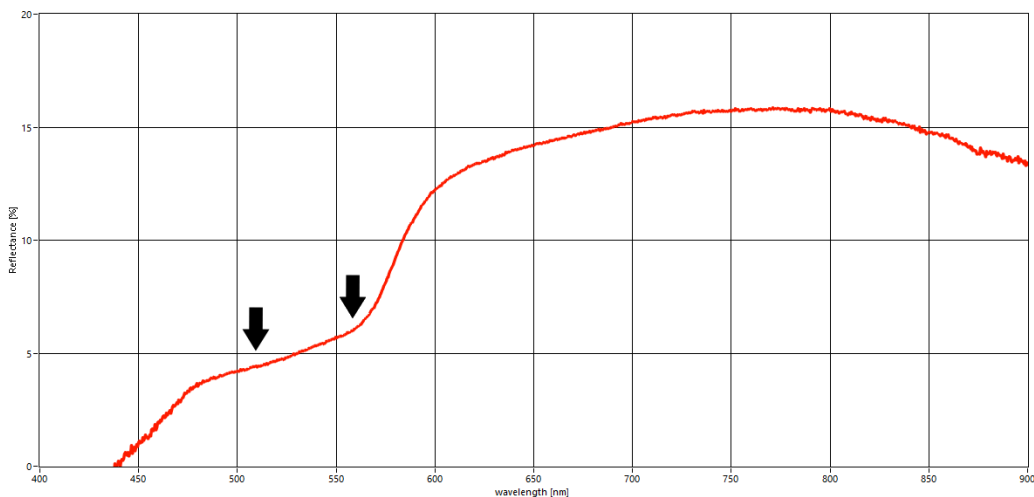

**Figure S2 – Representative FORS spectra.** FORS spectrum of a flesh tone from Inv. 453, suggesting the use of a mixture of earth pigments and red lake.

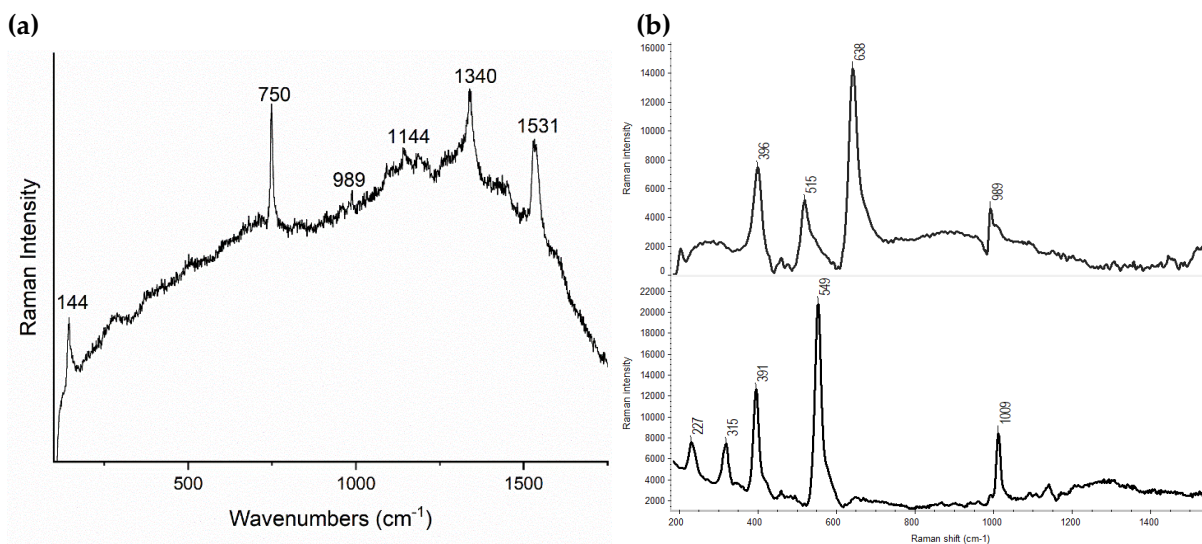

**Figure S3 – Representative Raman spectra.** (a) Raman spectrum of a sample of blue paint from Inv. 454, obtained with a benchtop system equipped with a microscope (courtesy of Raman Spectroscopy Laboratory, ISPC-CNR, Milan); relevant bands marked in the spectrum are assigned to phthalocyanine, anatase, and barite. (b) Raman spectra of blue (top) and red (bottom) areas from Inv. 454, obtained with a portable system; relevant bands marked in the top spectrum are assigned to anatase and barite, while signals in the bottom spectrum are due to minium and gypsum.

(a)

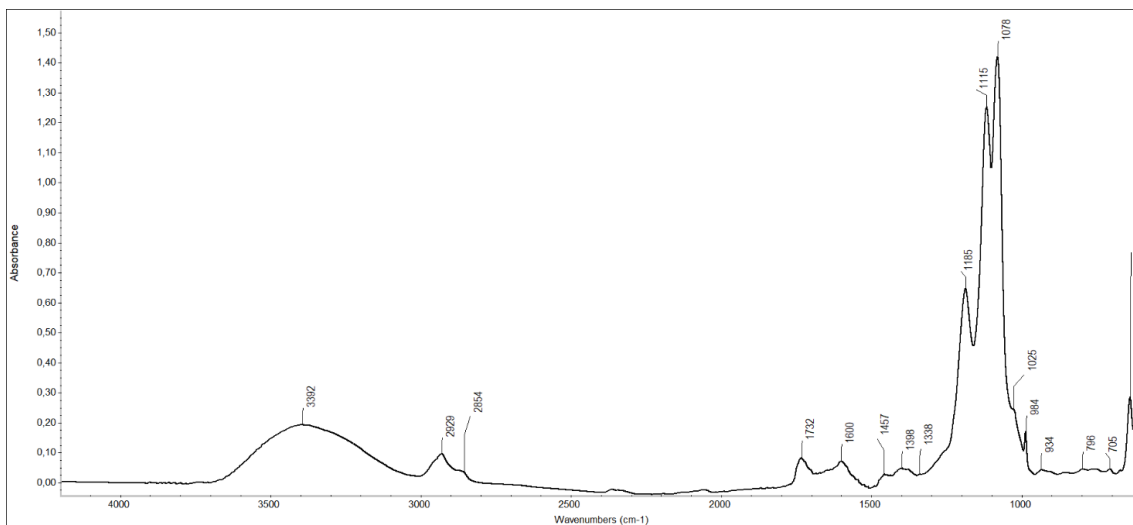

(b)

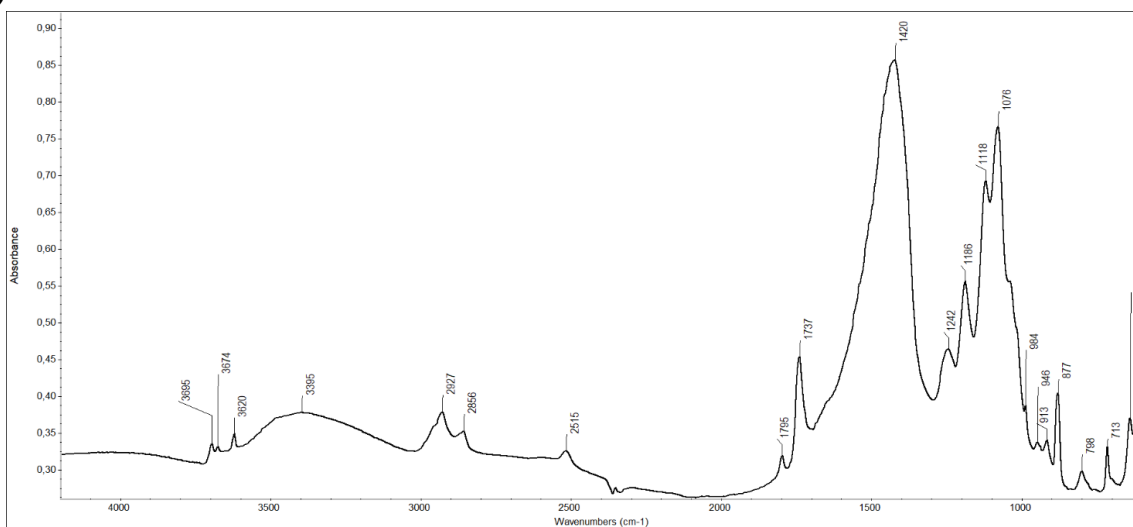

(c)

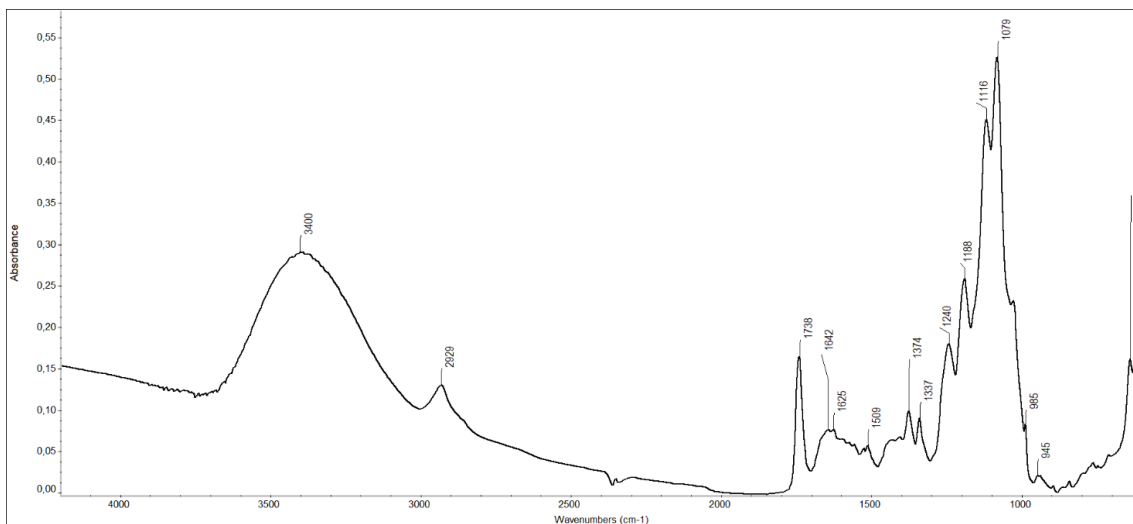

(d)

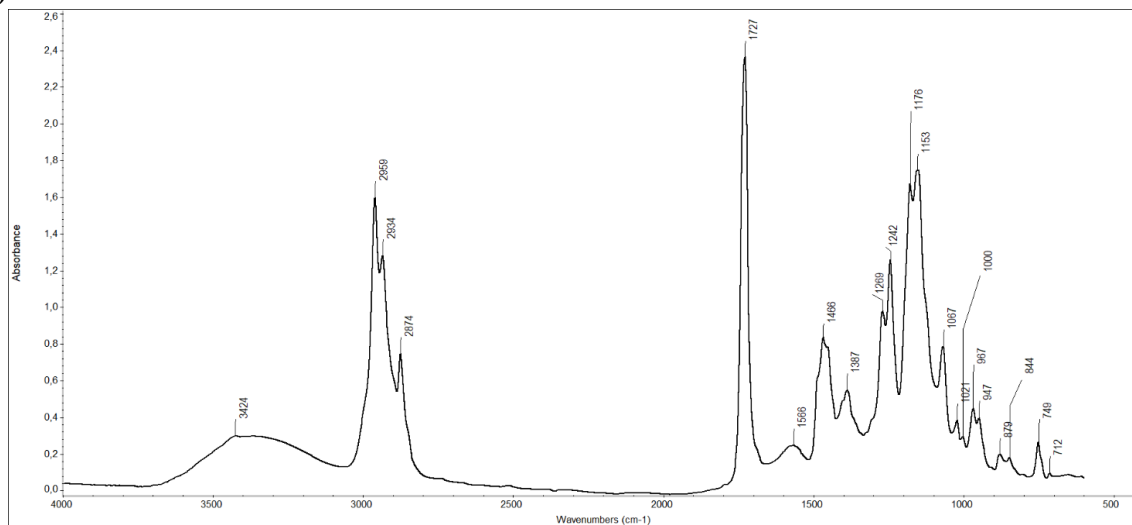

**Figure S4 – Representative FTIR spectra.** (a) Micro-ATR-FTIR spectrum of a white layer from Inv. 451, showing the presence of drying oil. (b) Micro-ATR-FTIR spectrum of a red layer from Inv. 449, showing the presence of polyvinyl acetate. (c) Micro-ATR-FTIR spectrum of a red layer from Inv. 452, showing the presence of an alkyd resin. (d) Micro-ATR-FTIR spectrum of a film-forming surface layer from Inv. 454, showing the presence of acrylics and an alkyd resin. Other components identified in these spectra include barite, calcite, talc, kaolinite and other silicates, zinc stearate, oxalates, and a synthetic organic pigment (possibly Pigment Red 4 or similar pigment).
